# Supplementary material for: Transcriptional profiling of MnSOD-mediated lifespan extension in Drosophila reveals a species-general network of aging and metabolic genes
Source: PubMed Central journal article supplement (PMC2246264; doi:10.1186/gb-2007-8-12-r262), 2007-12-09
Supplement: gb-2007-8-12-r262-S7.pdf [file gb-2007-8-12-r262-S7.pdf]

| <i>D. melanogaster</i>                                                         | <i>C. elegans</i>                                                                                       |
|--------------------------------------------------------------------------------|---------------------------------------------------------------------------------------------------------|
| <b>Gene / CG</b>                                                               | <b>CGC / GeneSeq</b>                                                                                    |
| <b>Up-regulated by MnSOD: Same chronological age</b>                           | <b>Up-regulated in <i>daf-2</i> mutants</b>                                                             |
| <b>Synaptobrevin</b><br><i>n-syb</i> / CG17248                                 | <b>Synaptobrevin</b><br>** <i>snb-1</i> / T10H9.4                                                       |
| <b>Jun-related antigen</b><br><i>Jra</i> / CG2275                              | <b>Transcriptional activator of the JUN family</b><br>*T24H10.2                                         |
| <b>Glutathione peroxidase</b><br><i>PHGPx</i> / CG12013                        | <b>Glutathione peroxidase</b><br>**T09A12.2                                                             |
| <b>Heterogeneous nuclear ribonucleoprotein</b><br><i>Hrb98DE</i> / CG9983      | <b>Heterogeneous nuclear ribonucleoprotein</b><br>** <i>msi-1</i> / R10E9.1                             |
| <b>Uncharacterized</b><br>CG15099                                              | <b>Predicted leucine zipper transcription factors</b><br>** <i>pad-1</i> / Y18D10A.13                   |
| <b>Catalase activity</b><br><i>kitty (kit)</i> / CG9314                        | <b>Catalase (peroxisomal, cytosolic)</b><br>*** <i>ctl-2</i> / Y54G11A.5b, *** <i>ctl-1</i> / Y54G11A.6 |
| <b>Up-regulated by MnSOD: Same physiological age</b>                           | <b>Up-regulated in <i>daf-2</i> mutants</b>                                                             |
| <b>Ortholog of the serine/threonine kinase Akt/PKB</b><br><i>Akt1</i> / CG4006 | <b>Ortholog of the serine/threonine kinase Akt/PKB</b><br>*** <i>akt-1</i> / C12D8.10B                  |
| <b>Ankryin</b><br><i>Ank</i> / CG1651                                          | <b>Ankyrin-like protein</b><br>*** <i>unc-44</i> / B0350.2A                                             |
| <b>Oxysterol binding</b><br>CG3860                                             | <b>Oxysterol-binding protein</b><br>*** <i>obr-2</i> / F14H8.1                                          |
| <b>Uncharacterized</b><br>CG7337                                               | <b>Similar to mouse MAPK binding protein</b><br>**H24G06.1                                              |
| <b>Sterol O-acyltransferase activity</b><br>CG8112                             | <b>Acyl-CoA:diacylglycerol o-acyltransferase activity</b><br>**H19N07.4                                 |
| <b>Actin monomer binding</b><br><i>cib</i> / CG4944                            | <b>Thymosin beta ortholog; actin polymerization</b><br>*** <i>tth-1</i> / F08F1.8                       |
| <b>Cytochrome P450 monooxygenase</b><br><i>Cyp6a13</i> / CG2397                | <b>Cytochrome P450 CYP4/CYP19/CYP26 subfamilies</b><br><i>cyp-29A2</i> / T19B10.1                       |
| <b>Beta-carotene 15,15'-monooxygenase activity</b><br><i>ninaB</i> / CG9347    | <b>Beta, beta-carotene 15,15'-dioxygenase</b><br>**F53C3.12                                             |
| <b>Ras GTPase</b><br><i>Ras64B</i>                                             | <b>Ras GTPase</b><br>** <i>ras-1</i> / C44C11.1                                                         |
| <b>Synaptotagmin</b><br><i>syt</i>                                             | <b>Synaptotagmin</b><br>*** <i>snt-1</i> / F31E8.2                                                      |

**Additional data file 7:** Additional longevity promoting genes conserved between *C. elegans daf-2* mutants and MnSOD over-expressing *Drosophila*. *Drosophila* and *C. elegans* ortholog matches that are differentially expressed in response to MnSOD over-expression (at only one time point) and in *daf-2* mutants in a *daf-16* dependent manner. Expected values from BLASTP are indicated as follows: \*  $5 \times 10^{-10} < p \leq 5 \times 10^{-02}$ , \*\*  $5 \times 10^{-70} < p \leq 5 \times 10^{-10}$ , \*\*\*  $p \leq 5 \times 10^{-70}$ . Beige shading indicates genes that are not reciprocal best BLAST hits, but are members of the corresponding gene family.
