# Supplementary material for: Transcriptional profiling of MnSOD-mediated lifespan extension in Drosophila reveals a species-general network of aging and metabolic genes
Source: PubMed Central journal article supplement (PMC2246264; doi:10.1186/gb-2007-8-12-r262), 2007-12-09
Supplement: gb-2007-8-12-r262-S8.pdf [file gb-2007-8-12-r262-S8.pdf]

| GO ID              | Function Name                                                | Genes                                                                                                                                                                                                                                                                                                                                            | Count | Ref  | p-val                  |
|--------------------|--------------------------------------------------------------|--------------------------------------------------------------------------------------------------------------------------------------------------------------------------------------------------------------------------------------------------------------------------------------------------------------------------------------------------|-------|------|------------------------|
| <b>GO: 0008150</b> | <b>biological process</b>                                    |                                                                                                                                                                                                                                                                                                                                                  |       |      |                        |
| GO:0008152         | metabolism                                                   | <i>PGRP-SD; Cyp12a4; CG3011; CG6687; wal; PHGPx; ade2; Cyp12d1-p; Tal; CG6214; NA; Nmdmc; CG10444; CG3036; tok; ade3; CRMP; CG10960; eas; CG11796; Gyk; Ance-4; Cyp6d5; CG8132; pug; Got1; Hn; CG12428; fbp; CG9009; ade5; CG5493; CG2789; CG5567; Pcaf; CG11963; ref(2)P; CG6045; PGRP-LB; CG10638; CG32549; GstE7; CG17836; CG11899; GstE1</i> | 45    | 3157 | 0.005                  |
| GO:0006807         | nitrogen compound metabolism                                 | <i>Got1; CG3011; CG12428; eas; CG11796; Hn; CG8132; pug; Nmdmc; CG5493; CG11899; Got1; CG11899; CG3011; eas; Nmdmc; pug</i>                                                                                                                                                                                                                      | 11    | 260  | 0.002                  |
| GO:0044271         | nitrogen compound biosynthesis                               | <i>Got1; CG3011; CG12428; eas; CG11796; Nmdmc; pug; CG5493; Hn; CG11899;</i>                                                                                                                                                                                                                                                                     | 6     | 55   | 0.001                  |
| GO:0009308         | amine metabolism                                             | <i>Got1; CG3011; CG12428; eas; CG11796; Nmdmc; pug; CG5493; Hn; CG11899;</i>                                                                                                                                                                                                                                                                     | 10    | 247  | 0.004                  |
| GO:0009309         | amine biosynthesis                                           | <i>Got1; CG11899; CG3011; eas; CG11796; CG5493; Hn; CG11899;</i>                                                                                                                                                                                                                                                                                 | 6     | 55   | 0.001                  |
| GO:0006519         | amino acid and derivative metabolism                         | <i>Got1; CG3011; CG12428; eas; CG11796; pug; CG5493; CG11899; Nmdmc;</i>                                                                                                                                                                                                                                                                         | 10    | 191  | 0.001                  |
| GO:0006520         | amino acid metabolism                                        | <i>Got1; CG3011; CG12428; CG11796; CG5493; Hn; CG11899; Nmdmc; pug</i>                                                                                                                                                                                                                                                                           | 9     | 173  | 0.002                  |
| GO:0008652         | amino acid biosynthesis                                      | <i>Got1; CG11899; CG3011; Nmdmc; pug</i>                                                                                                                                                                                                                                                                                                         | 5     | 47   | 0.003                  |
| GO:0019752         | carboxylic acid metabolism                                   | <i>Got1; CG3011; CG12428; CG9009; CG11796; Nmdmc; pug; CG5493; Hn; CG11899;</i>                                                                                                                                                                                                                                                                  | 10    | 252  | 0.004                  |
| GO:0006725         | aromatic compound metabolism                                 | <i>CG6045; CG32549; CG11796; ade5; Hn; Nmdmc; pug</i>                                                                                                                                                                                                                                                                                            | 9     | 92   | 1.5 x 10 <sup>-4</sup> |
| GO:0046483         | heterocycle metabolism                                       | <i>ade5; CG6045; ade2; ade3; CG32549; Nmdmc; pug</i>                                                                                                                                                                                                                                                                                             | 7     | 91   | 0.001                  |
| GO:0006144         | purine base metabolism                                       | <i>ade5; CG6045; ade2; ade3; CG32549</i>                                                                                                                                                                                                                                                                                                         | 5     | 36   | 0.001                  |
| GO:0009127         | purine nucleoside monophosphate biosynthesis                 | <i>ade5; ade2; ade3</i>                                                                                                                                                                                                                                                                                                                          | 3     | 11   | 0.004                  |
| GO:0009168         | purine ribonucleoside monophosphate biosynthesis             | <i>ade5; ade2; ade3</i>                                                                                                                                                                                                                                                                                                                          | 3     | 11   | 0.004                  |
| GO:0006188         | IMP biosynthesis                                             | <i>ade5; ade2; ade3</i>                                                                                                                                                                                                                                                                                                                          | 3     | 7    | 0.001                  |
| GO:0006732         | coenzyme metabolism                                          | <i>CG10444; CG2789; Tal; CG6687; Nmdmc; CG11963; pug</i>                                                                                                                                                                                                                                                                                         | 7     | 145  | 0.008                  |
| GO:0009396         | folic acid and derivative biosynthesis                       | <i>Nmdmc; pug</i>                                                                                                                                                                                                                                                                                                                                | 2     | 2    | 0.003                  |
| <b>GO: 0003674</b> | <b>molecular function</b>                                    |                                                                                                                                                                                                                                                                                                                                                  |       |      |                        |
| GO:0003824         | catalytic activity                                           | <i>PGRP-SD; Cyp12a4; CG3011; CG4716; PHGPx; Cyp12d1-p; CG6687; Nmdmc; ade2; CRMP; eas; CG11796; Gyk; Tal; CG8132; Cyp6d5; wal; CG11899; GstE1</i>                                                                                                                                                                                                | 40    | 2375 | 0.001                  |
| GO:0016491         | oxidoreductase activity;                                     | <i>pug; Got1; tok; CG1681; ade3; CG12428; fbp; CG9009; ade5; CG6045; PGRP-LB; Pcaf; CG5493; CG5567; ref(2)P; CG11963; CG10638; CG32549; CG6214; GstE7; Hn;</i>                                                                                                                                                                                   | 14    | 401  | 0.001                  |
| GO:0016645         | oxidoreductase activity, acting on the CH-NH group of donors | <i>CG4716; Nmdmc; pug</i>                                                                                                                                                                                                                                                                                                                        | 3     | 12   | 0.004                  |
| GO:0051213         | dioxygenase activity                                         | <i>CG11796; CG5493</i>                                                                                                                                                                                                                                                                                                                           | 2     | 4    | 0.008                  |
| GO:0004486         | methylenetetrahydrofolate dehydrogenase activity             | <i>CG4716; Nmdmc; pug</i>                                                                                                                                                                                                                                                                                                                        | 3     | 3    | 2.8 x 10 <sup>-4</sup> |
| GO:0016810         | hydrolase activity                                           | <i>PGRP-SD; PGRP-LB; CRMP; CG8132; Nmdmc; pug</i>                                                                                                                                                                                                                                                                                                | 6     | 53   | 0.001                  |
| GO:0019238         | cyclohydrolase activity                                      | <i>Nmdmc; pug</i>                                                                                                                                                                                                                                                                                                                                | 2     | 3    | 0.005                  |
| GO:0004372         | transferase activity                                         | <i>ade3; CG3011</i>                                                                                                                                                                                                                                                                                                                              | 2     | 3    | 0.005                  |

**Additional data file 8:** MnSOD-regulated xenobiotic detoxification genes. Gene Ontology classifications and functional overrepresentation of MnSOD up-regulated genes that are also up-regulated due to the xenobiotic response to phenobarbital.
